# Supplementary material
Source: MDPI journal article supplement (https://www.mdpi.com/2311-5637/9/2/165)
Supplement: s1 [file s1]

**Table S1.** Compounds identified using retention indices (RI) measured in the study and those reported in the literature, as well as using confirmation with reference compounds.

| Compound                                        | RI (measured) <sup>a</sup> | RI (literature) <sup>b</sup> |
|-------------------------------------------------|----------------------------|------------------------------|
| <i>Acetates</i>                                 |                            |                              |
| Ethyl acetate                                   | 891                        | 888                          |
| 2-Methylpropyl acetate*                         | 1017                       | 1012                         |
| 3-methyl-1-butyl acetate*                       | 1124                       | 1123                         |
| Ethyl phenylacetate                             | 1799                       | 1783                         |
| 2-phenylethyl acetate                           | 1832                       | 1813                         |
| <i>Esters</i>                                   |                            |                              |
| Ethyl butanoate                                 | 1041                       | 1036                         |
| Ethyl 3-methylbutanoate*                        | 1072                       | 1068                         |
| Ethyl hexanoate*                                | 1235                       | 1233                         |
| Ethyl lactate ((L)-ethyl 2-hydroxypropanoate)   | 1349                       | 1349                         |
| Ethyl octanoate*                                | 1436                       | 1435                         |
| Ethyl 3-hydroxybutyrate                         | 1528                       | 1532                         |
| Ethyl nonanoate                                 | 1538                       | 1532                         |
| Ethyl 2-hydroxy-4-methylpentanoate              | 1550                       | 1547                         |
| Isoamyl lactate (Isopentyl 2-hydroxypropanoate) | 1577                       | 1580                         |
| Ethyl 2-furoate                                 | 1630                       | 1618                         |
| Methyl benzoate                                 | 1634                       | 1640                         |
| Ethyl decanoate*                                | 1642                       | 1639                         |
| Diethyl succinate                               | 1684                       | 1681                         |
| Ethyl butyl succinate                           | 1803                       | 1820                         |
| Ethyl dodecanoate                               | 1851                       | 1843                         |
| Ethyl 3-methylbutyl succinate                   | 1914                       | 1901                         |
| <i>Aldehydes</i>                                |                            |                              |
| 3-methyl butanal*                               | 922                        | 918                          |
| Benzaldehyde*                                   | 1533                       | 1528                         |
| 4-methylbenzaldehyde                            | 1663                       | 1655                         |
| Dodecanal                                       | 1717                       | 1711                         |
| <i>Alcohols</i>                                 |                            |                              |
| 2-methyl-1-propanol                             | 1107                       | 1092                         |
| Butanol*                                        | 1157                       | 1142                         |
| 4-methyl-2-pentanol                             | 1175                       | 1168                         |
| 3-methyl-1-butanol*                             | 1217                       | 1209                         |
| Hexanol*                                        | 1360                       | 1355                         |
| cis-3-Hexen-1-ol*                               | 1390                       | 1382                         |
| 2-Nonanol                                       | 1524                       | 1521                         |
| Octanol*/octyl formate                          | 1568                       | 1553                         |
| 3-(methylthio)-1-propanol                       | 1737                       | 1734                         |
| Phenylethyl alcohol*                            | 1938                       | 1907                         |
| <i>Volatile acids</i>                           |                            |                              |
| Acetic acid*                                    | 1454                       | 1449                         |
| 2-methyl propanoic acid                         | 1576                       | 1570                         |
| Butanoic acid*                                  | 1640                       | 1624                         |
| 3-methyl butanoic acid                          | 1681                       | 1666                         |
| Hexanoic acid*                                  | 1860                       | 1846                         |

|                            |      |      |
|----------------------------|------|------|
| Octanoic acid*             | 2075 | 2060 |
| Nonanoic acid*             | 2177 | 2170 |
| Decanoic acid*             | 2267 | 2276 |
| <i><b>Ketones</b></i>      |      |      |
| Butyrolactone              | 1647 | 1647 |
| Acetophenone*              | 1666 | 1647 |
| $\beta$ -damascenone*      | 1841 | 1823 |
| <i><b>Others</b></i>       |      |      |
| Toluene                    | 1046 | 1042 |
| 1-(1-ethoxyethoxy)pentane  | 1096 | 1098 |
| N-(3-Methylbutyl)acetamide | 1883 | 1890 |

---

\* Identified with external standard; <sup>a</sup> Kovats retention indices calculated using n-alkanes C7-C21; <sup>b</sup> Retention indices from the National Institute of Standards and Technology database ([www.nist.gov](http://www.nist.gov));
